# Supplementary material for: Longitudinal Developmental Outcomes of Infants and Toddlers With Traumatic Brain Injury
Source: PubMed Central journal article supplement (PMC9856699; doi:10.1001/jamanetworkopen.2022.51195), 2023-01-17
Supplement: jamanetwopen-e2251195-s002.pdf [file jamanetwopen-e2251195-s002.pdf]

## Data Sharing Statement

Keenan. Longitudinal Developmental Outcomes of Infants and Toddlers With Traumatic Brain Injury. *JAMA Netw Open*. Published January 17, 2023.

doi:10.1001/jamanetworkopen.2022.51195

### Data

**Data available:** No

### Additional Information

**Explanation for why data not available:** De-identified data will be made available after documentation as appropriate is completed by the relevant entities.
